# Supplementary material for: USP21 deubiquitinase elevates macropinocytosis to enable oncogenic KRAS bypass in pancreatic cancer
Source: PubMed Central journal article supplement — Genes Dev. 2021 Oct 1;35(19-20):1327–32. doi: 10.1101/gad.348787.121 (PMC8494209; doi:10.1101/gad.348787.121), 2021-10-01
Supplement: supp_gad.348787.121_Supplemental_Material.pdf [file supp_gad.348787.121_Supplemental_Material.pdf]

**USP21 Deubiquitinase Elevates Macropinocytosis to Enable Oncogenic KRAS Bypass in  
Pancreatic Cancer**

Pingping Hou, Xingdi Ma, Zecheng Yang, Qiang Zhang, Chang-Jiun Wu, Jun Li, Lin Tan,  
Wantong Yao, Liang Yan, Xin Zhou, Alec C. Kimmelman, Philip L Lorenzi, Jianhua Zhang,  
Shan Jiang, Denise Spring, Y. Alan Wang, and Ronald A. DePinho

Supplemental Figures S1-8

Supplemental Table S1-2

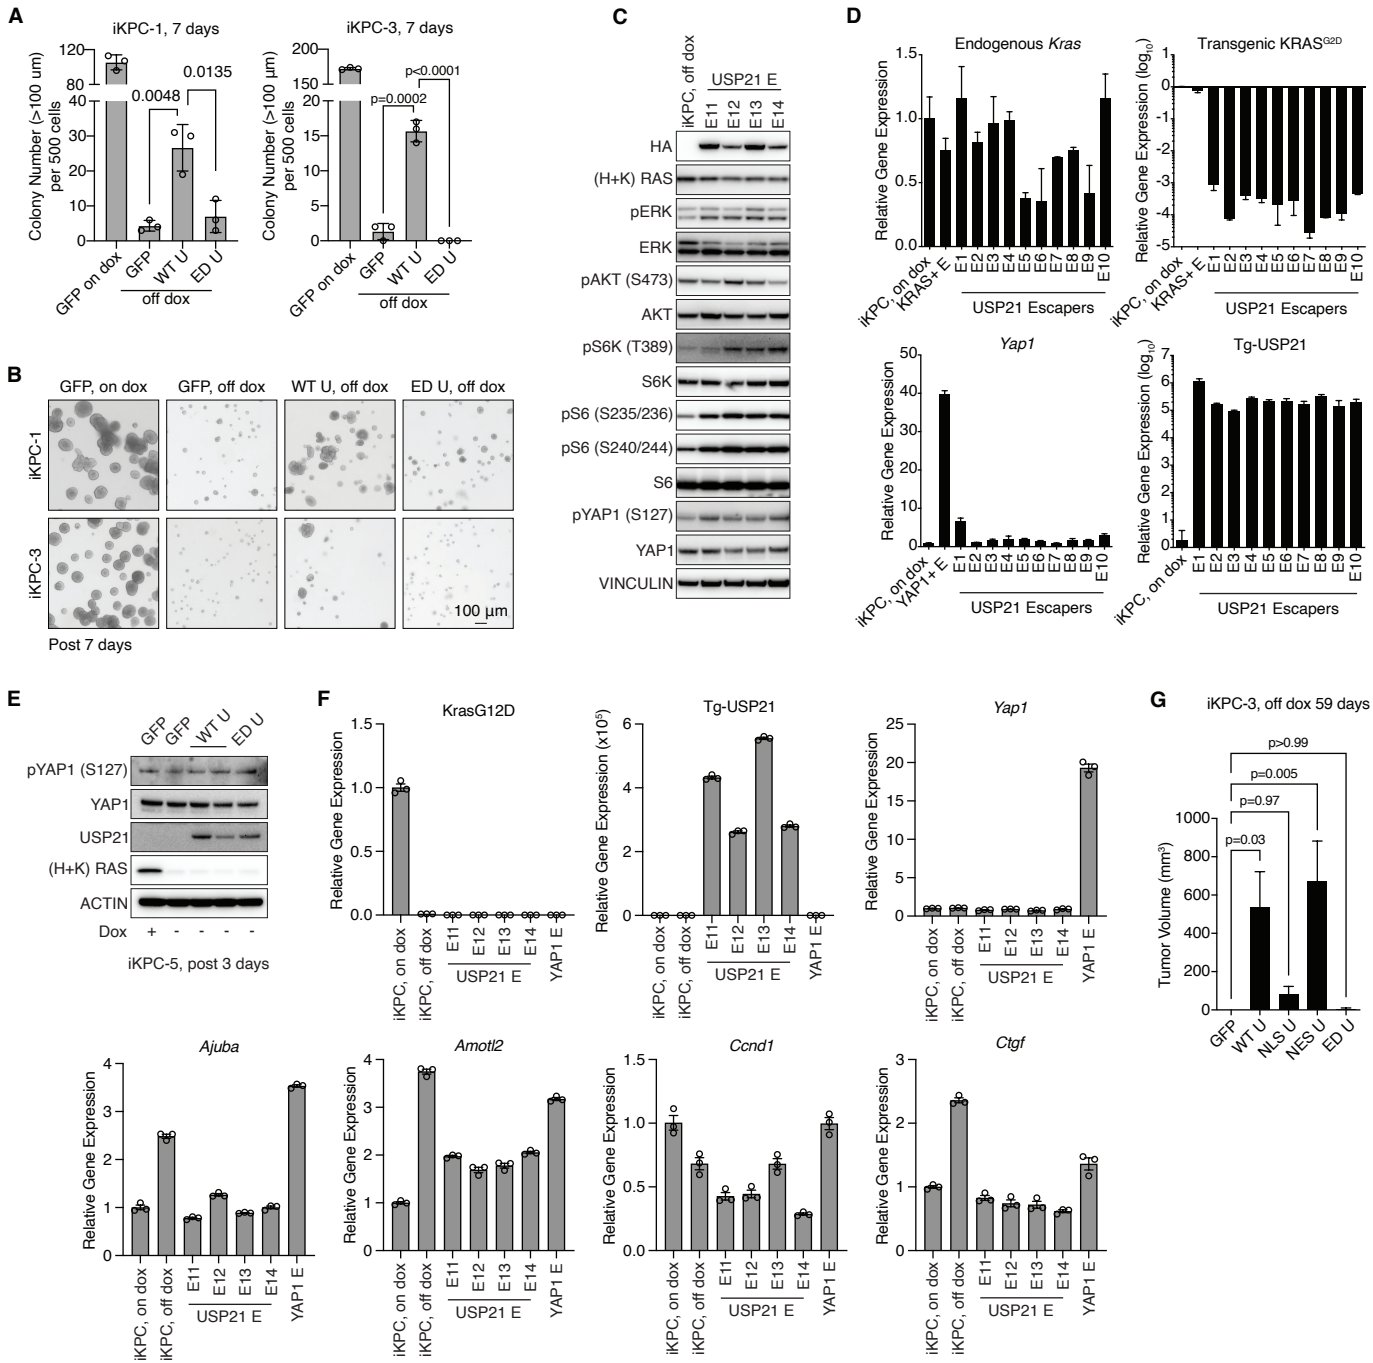

**Figure S1. USP21 promotes the bypass of KRAS\* dependency in PDAC. (A-B) KRAS\*-independent colony formation analysis. (A)** and representative images **(B)** comparing GFP-, WT USP21- and ED USP21-OE iKPC cells. GFP-OE iKPC cells w/ dox is positive control. **(C)** Western blot analysis of KRAS\* signaling pathway and YAP1 in USP21 escaper cells. KRAS\*-extinguished iKPC cells are control. **(D)** Validation of gene expression of endogenous Kras, transgenic KrasG12D, Yap1, and exogenous USP21 by RT-PCR. Data are represented as mean  $\pm$  SD. **(E)** Western blot analysis of YAP1 phosphorylation in GFP-, WT U- and ED U-OE iKPC cells after KRAS\* extinction for 3 days. KRAS\*-expressing cells are control. **(F)** Expression of canonical YAP1 target genes in USP21 escapers. Dox on and off iKPC cells and *de novo* generated YAP1 amplified escaper cells (YAP1 E) are control samples. **(G)** KRAS\*-independent colony formation analysis comparing GFP-, WT USP21-, nucleus-localized NLS USP21-, cytoplasm-localized NES USP21- and ED USP21-OE iKPC cells. For A and F, data are represented as mean  $\pm$  SEM. E1-E14, USP21 escapers.

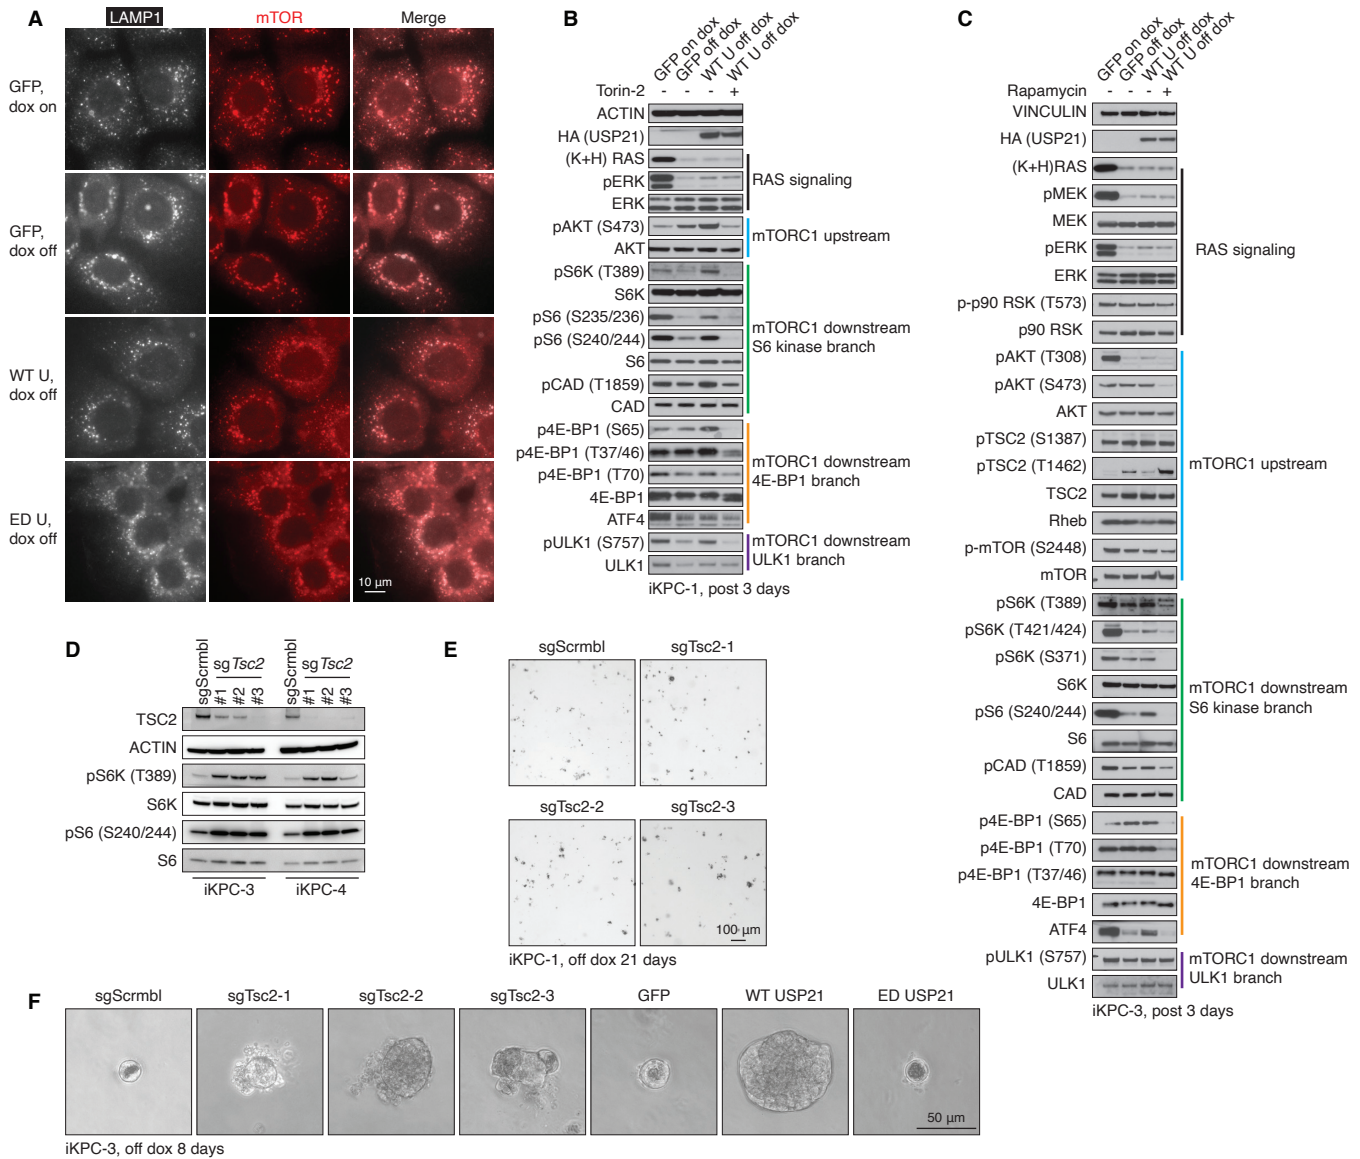

**Figure S2. USP21 does not regulate mTOR localization or upstream signaling activation.** (A) Immunofluorescence staining of mTOR and LAMP1 in GFP-, WT USP21- and ED USP21-OE iKPC cells at day 3 after KRAS\* extinction. KRAS\*-expressing GFP-OE iKPC cells are positive control. (B-C) Western blot analysis comparing WT USP21-OE iKPC cells treated with DMSO and mTOR inhibitor Torin-2 (B) or rapamycin (C). (D) Validation of sgRNAs targeting *Tsc2* by western blot analysis. (E) KRAS\*-independent colony formation analysis comparing scramble control and *Tsc2* sgRNAs in iKPC cells. (F) Colony morphology comparison between iKPC cells overexpressing *Tsc2* sgRNAs and USP21 variants.

### Supplemental\_Fig\_S3

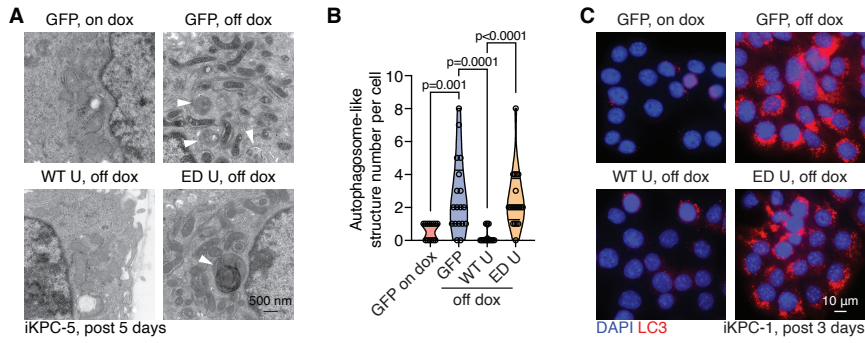

**Figure S3. USP21 relieves KRAS\*-extinction induced metabolic stress. (A-B)** Representative TEM images (A) and autophagosome quantification (B) comparing GFP-, WT USP21- and ED USP21-OE iKPC cells at day 5 after KRAS\* extinction. GFP-OE iKPC cells w/ dox is positive control. Autophagosome structures were indicated by white arrowheads. Data are represented as mean  $\pm$  SEM. (C) Representative LC3 staining comparing GFP-, WT USP21- and ED USP21-OE iKPC cells at day 3 after KRAS\* extinction. GFP-OE iKPC cells w/ dox is positive control.

Supplemental\_Fig\_S4

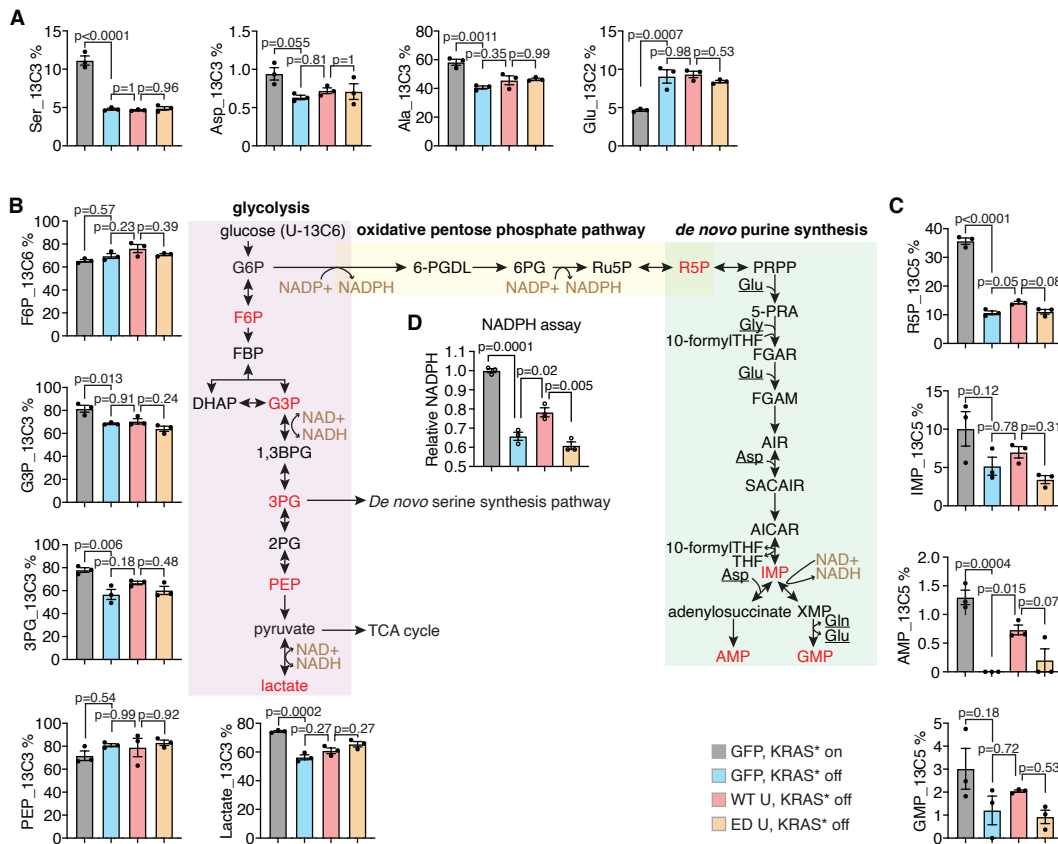

**Figure S4. USP21 does not promote metabolic flux to the de novo amino acid synthesis pathways.** (A-C) Metabolic flux analysis of KRAS\*-on GFP-OE iKPC cells and KRAS\*-off GFP-, WT USP21- and ED USP21-OE iKPC cells using isotope labeled glucose. Samples were pulse labeled for 15 minutes before collection. Comparison of selected metabolites in amino acid synthesis pathways (A), glycolysis (B) and *de novo* purine synthesis pathway (C) are shown. (D) NADPH quantification assay comparing KRAS\*-on GFP-OE iKPC cells and KRAS\*-off GFP-, WT USP21- and ED USP21-OE iKPC cells. For A-D, data are represented as mean  $\pm$  SEM.

Supplemental\_Fig\_S5

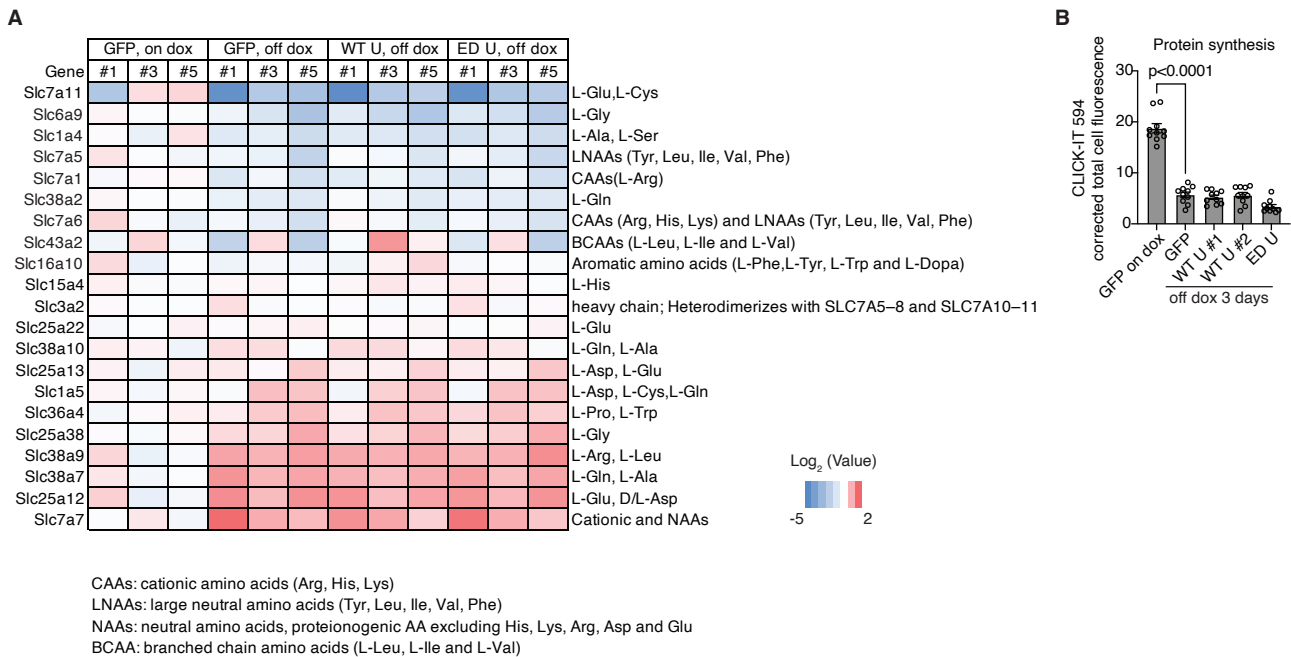

**Figure S5. USP21 does not alter amino acid transporter expression pattern at transcriptional level.** (A) Relative gene expression to KRAS\*-on GFP-OE iKPC cells were calculated using RPKM values from RNA sequencing data. The #1, #3 and #5 were three independent iKPC cell lines. The KRAS\*-on GFP-OE iKPC cells and KRAS\*-off GFP-, WT USP21- and ED USP21-OE iKPC cells were compared. (B) Protein synthesis analysis comparing KRAS\*-on GFP-OE iKPC cells and KRAS\*-off GFP-, WT USP21- and ED USP21-OE iKPC-5 cells. Data are represented as mean ± SEM.

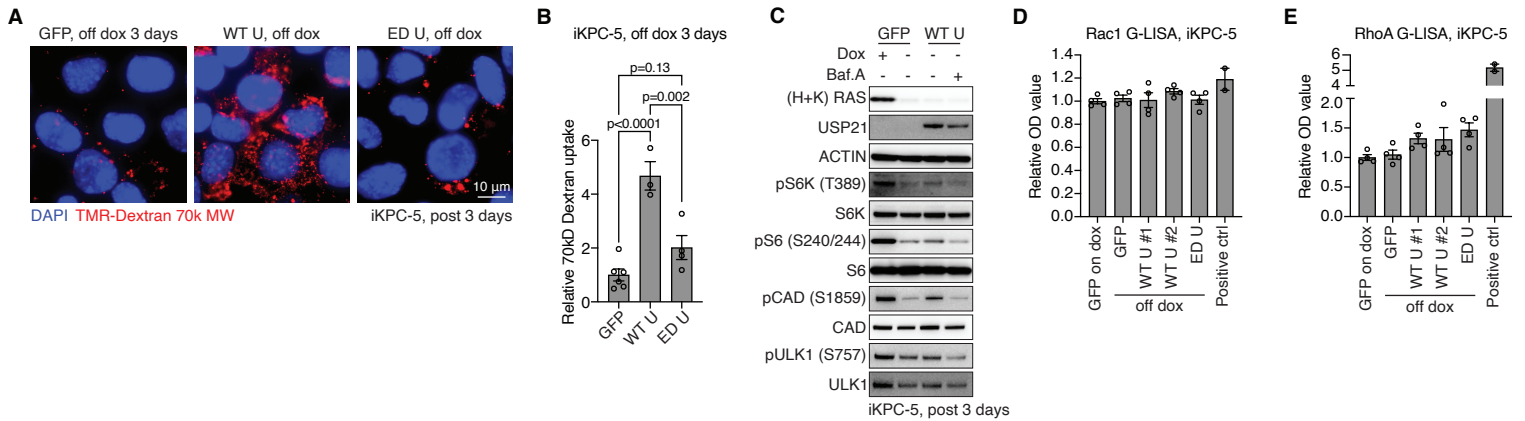

**Figure S6. USP21 elevates macropinocytosis activity after KRAS\* extinction.** (A-B) Representative images (A) and the quantification of Dextran particle uptake (B) comparing GFP-, WT USP21- and ED USP21-OE iKPC cells at day 3 after KRAS\* extinction. (C) Inhibition of macropinocytosis suppresses mTOR activation by USP21. WT USP21-OE iKPC-5 cells with and without bafilomycin A (Baf.A) treatment were collected 3 days after KRAS\* extinction for western blot analysis. GFP-OE iKPC cells w/ dox is positive control; GFP-OE iKPC cells w/ o dox is negative control. Baf.A was added 24 hours before collection at 100nM. (D-E) G-LISA analysis of Rac1 (C) and RhoA (D) activity comparing KRAS\*-on GFP-OE iKPC cells and KRAS\*-off GFP-, WT USP21- and ED USP21-OE iKPC cells. Rac1 and RhoA proteins are positive controls, respectively. For B-D, data are represented as mean  $\pm$  SEM.

Supplemental\_Fig\_S7

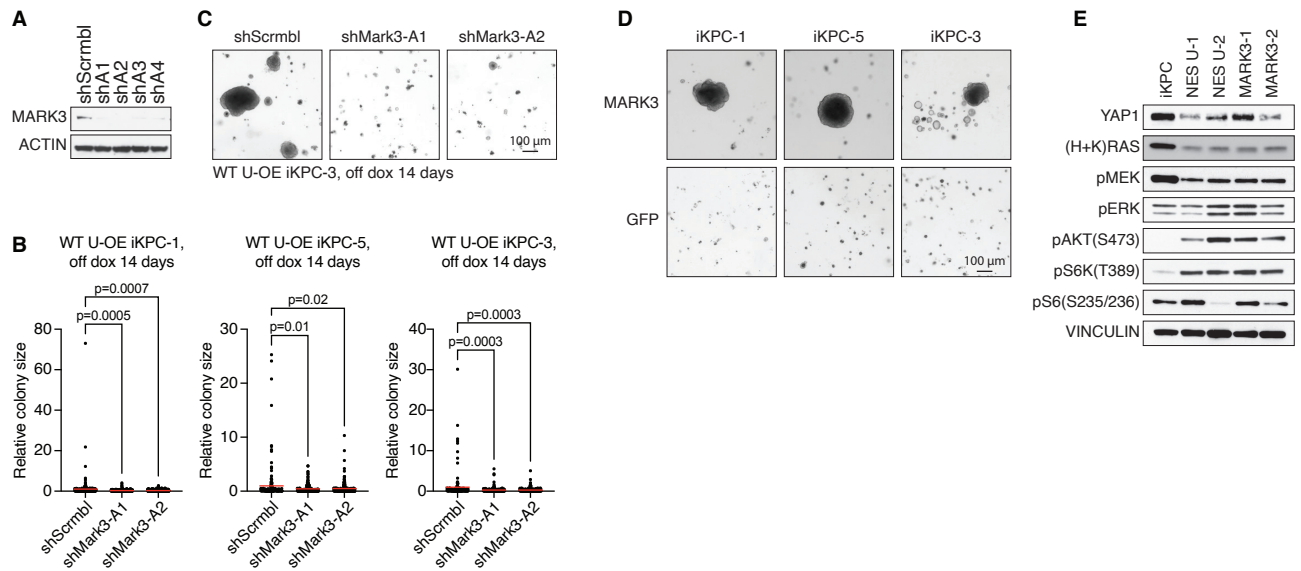

**Figure S7. MARK3 is required for USP21-driven KRAS\* bypass.** (A) Western blot analysis of MARK3 protein level after gene knockdown. (B-C) KRAS\*-independent colony formation analysis (B) and representative images (C) comparing scramble control and Mark3 knockdown in WT USP21-OE iKPC cells after KRAS\* extinction. (D) Representative images of colonies comparing GFP- and MARK3-OE iKPC cells after KRAS\* extinction. (E) Western blot analysis of KRAS downstream signaling pathways in parental iKPC cells, NES USP21 escaper cells and MARK3 escaper cells.



Supplemental\_Fig\_S8

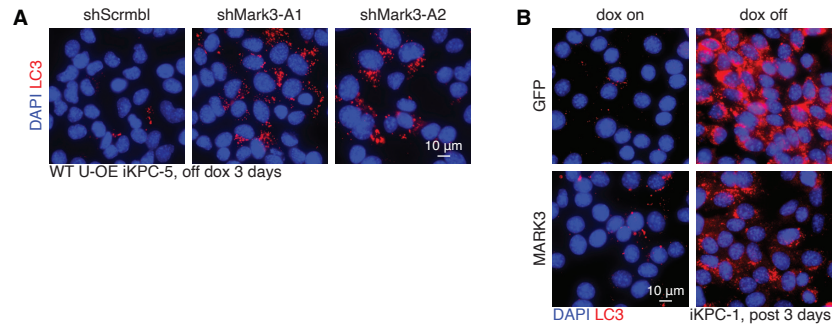

**Figure S8. MARK3 regulates autophagy.** (A) Representative images of LC3 staining comparing WT USP21-OE iKPC cells with scramble control and Mark3 shRNAs at day 3 after KRAS\* extinction. (B) Representative images of LC3 staining comparing GFP- and MARK3-OE iKPC cells at day 3 after KRAS\* extinction.

## Supplemental\_Table\_S1

| ID         | Gene ID     | Sequence                                                  |
|------------|-------------|-----------------------------------------------------------|
| shMark3-A1 | NM_022801   | CCGGCGGGAAGTACAGAATCCCTTTCTCGAGAAAGGGATTCTGTACTTCCCGTTTTT |
| shMark3-A2 | NM_022801   | CCGGCGGAAACTACAGACTGTTGAACTCGAGTTCAACAGTCTGTAGTTTCCGTTTTT |
| shMark3-A3 | NM_022801   | CCGGGCTAAGTTTAGACAGATTGTTCTCGAGAACAATCTGTCTAAACTTAGCTTTTT |
| shMark3-A4 | NM_022801   | CCGGGAGTAATATTTAGGCAATAACCTCGAGGTTATTGCCTAAATATACTCTTTTTG |
| sgTsc2-1   | NM_011647.2 | GACTGAGTTTATCATCACAT (targeted sequence)                  |
| sgTsc2-2   | NM_011647.2 | TCATTCGGATGCGATTGTTG (targeted sequence)                  |
| sgTsc2-3   | NM_011647.2 | CTCACCTGTCCTCCATGATG (targeted sequence)                  |

**Supplemental\_Table\_S2**

| <b>Antibody</b>             | <b>Application</b> | <b>Vendor</b> | <b>Cat. #</b> |
|-----------------------------|--------------------|---------------|---------------|
| USP21                       | IHC                | Sigma         | HPA028397     |
| USP21                       | WB                 | Santa Cruz    | sc-79305      |
| FLAG                        | IP, WB             | Sigma         | F1804         |
| HA                          | IP, WB             | BioLegend     | 901501        |
| ubH2A                       | WB                 | CST           | 8240          |
| YAP1                        | IHC, WB            | CST           | 14074         |
| Ki67                        | IHC                | Thermo        | RM-9106-S1    |
| total RAS (H+K)             | WB                 | abcam         | ab191595      |
| pMEK                        | WB                 | CST           | 4694          |
| MEK                         | WB                 | CST           | 9154          |
| pERK                        | IHC, WB            | CST           | 4370          |
| ERK                         | WB                 | CST           | 4695          |
| pAKT (S473)                 | WB                 | CST           | 4060          |
| AKT                         | WB                 | CST           | 2920          |
| pS6K (T389)                 | WB                 | CST           | 9234          |
| S6K                         | WB                 | CST           | 2708          |
| pS6 (S235/236)              | IHC, WB            | CST           | 4858          |
| pS6 (S240/244)              | WB                 | CST           | 2215          |
| S6                          | WB                 | CST           | 2217          |
| pULK1 (S757)                | WB                 | CST           | 14202         |
| ULK1                        | WB                 | CST           | 8054          |
| LC3                         | IF                 | CST           | 83506         |
| LAMP1                       | IF                 | Santa Cruz    | sc-19992      |
| mTOR                        | IF                 | CST           | 2983          |
| pCAD (T1859)                | WB                 | CST           | 12662         |
| CAD                         | WB                 | CST           | 93925         |
| p4E-BP1 (S65)               | WB                 | CST           | 9451          |
| p4E-BP1 (T37/46)            | WB                 | CST           | 2855          |
| p4E-BP1 (T70)               | WB                 | CST           | 9455          |
| 4E-BP1                      | WB                 | CST           | 9452          |
| ATF4                        | WB                 | CST           | 11815         |
| TSC2                        | WB                 | CST           | 4308          |
| MARK3                       | WB                 | abcam         | ab52626       |
| ACTIN                       | WB                 | Sigma         | A2228         |
| VINCULIN                    | WB                 | Sigma         | V4505         |
| Anti-rabbit IgG, HRP-linked | WB                 | CST           | 7074s         |
| Anti-mouse IgG, HRP-linked  | WB                 | CST           | 7076s         |
| Rabbit anti-Goat IgG (H+L)  | WB                 | Thermo        | 61-1620       |
